# Supplementary figures and images for: Phylogenomics of white-eyes, a ‘great speciator’, reveals Indonesian archipelago as the center of lineage diversity
Source: eLife journal article supplement (doi:10.7554/elife.62765), 2020-12-22

- Bootstrap = 100
- $90 \leq \text{Bootstrap} \leq 99$
- ◐  $80 \leq \text{Bootstrap} \leq 89$

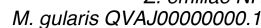

Supplement: supp [file elife_poa_e62765_Figure_2_figure_supplement_1.pdf › elife_poa_e62765_Figure_2_figure_supplement_1.pdf]

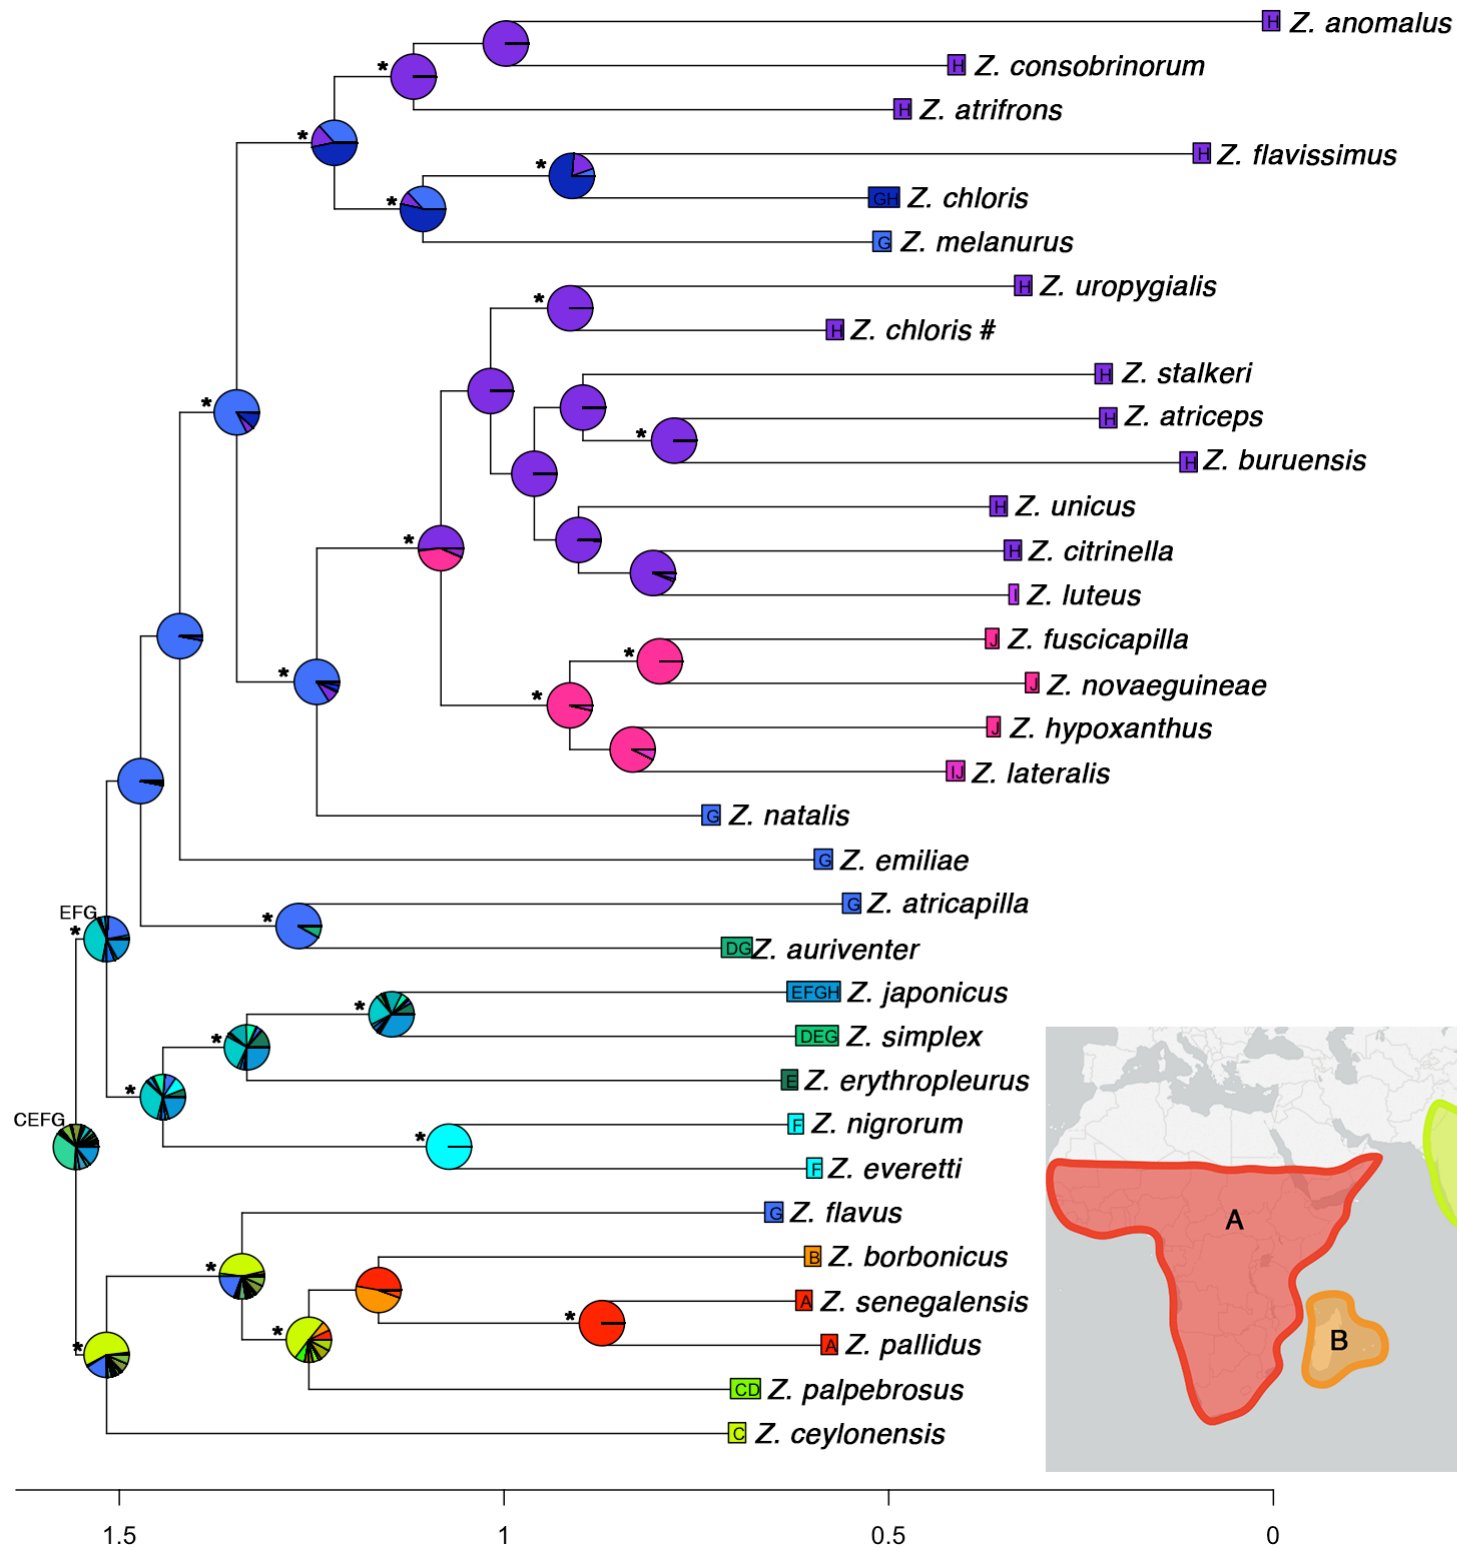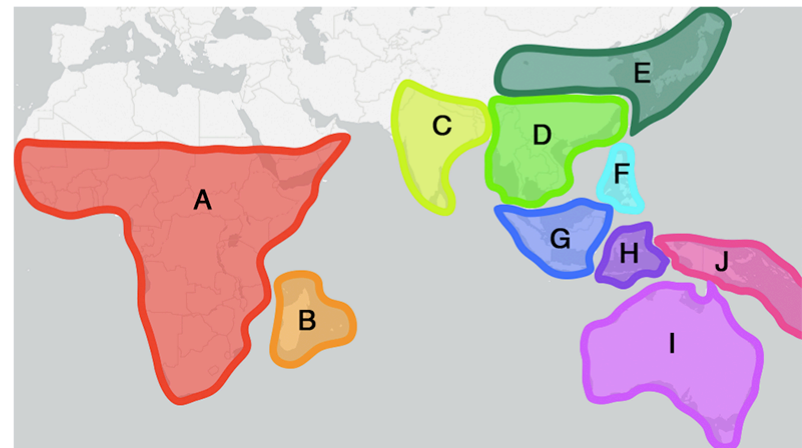

Supplement: supp [file elife_poa_e62765_Figure_2_figure_supplement_2.pdf › elife_poa_e62765_Figure_2_figure_supplement_2.pdf]

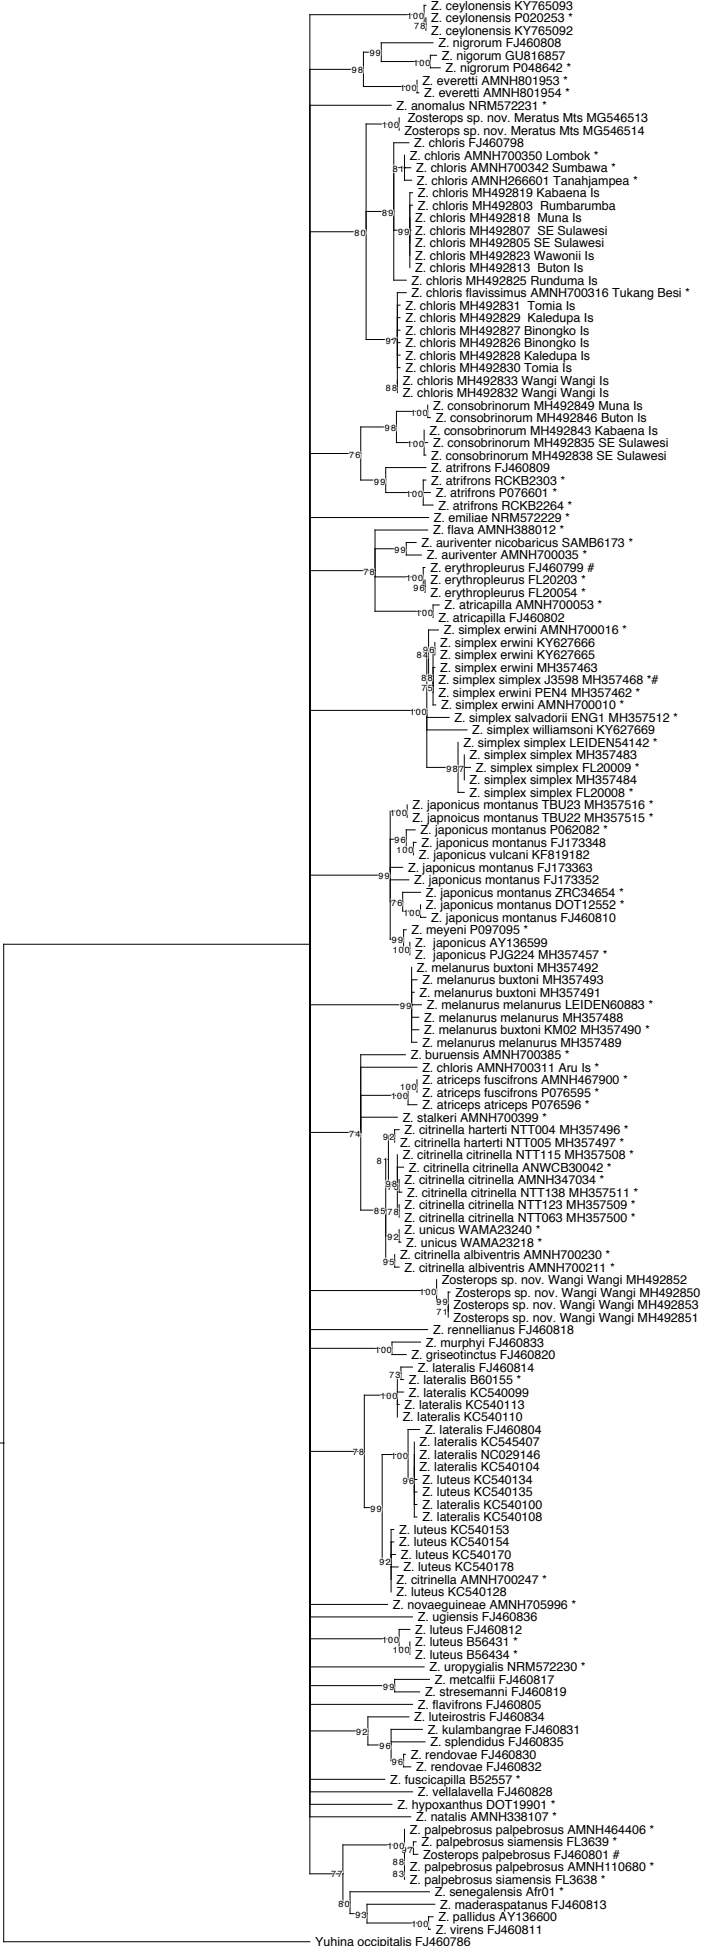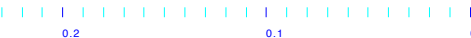

Supplement: supp [file elife_poa_e62765_Figure_2_figure_supplement_3.pdf › elife_poa_e62765_Figure_2_figure_supplement_3.pdf]
